# Supplementary material
Source: Springer Nature journal article supplement (https://www.springermedizin.de/resource/supplementary/12885_2011_2964_MOESM2_ESM.pdf/9462330)
Supplement: MOESM2 [file 9462330]

Key word search performed in MEDLINE and PUBMED, complementary search performed in ERIC and CINAHL

Studies included for abstract review:  
 $n=44$

Excluded; the study was not published in English:  
 $n=4$

Excluded; the study was not performed on humans:  
 $n=2$

Excluded; the study was not designed to capture data on alcohol cessation (ex-drinkers) or did not distinguish between lifetime abstainers and former drinkers and/or did not investigate cancer of the liver:  
 $n=23$

Studies read in full:  
 $n=15$

Excluded; the study did not meet the search criteria:  
 $n=8$

Included; manual search of reference lists from studies read in full:  
 $n=4$

Included; complementary search performed using first 30 hits of Google Scholar and Google:  
 $n=0$

Studies included for review:  
 $n=11$
